# Supplementary material for: Identifying people at high risk for developing sleep apnea syndrome (SAS): a cross-sectional study in a Pakistani population
Source: PubMed Central journal article supplement (PMC2615786; doi:10.1186/1471-2377-8-50), 2008-12-17
Supplement: 1471-2377-8-50-S1.pdf [file 1471-2377-8-50-S1.pdf]

## برلن سوالنامہ

تاریخ ..... نام سوال کنندہ ..... مقام .....  
 جوہد ہندو کاقد (میٹرز میں) ..... وزن (کلوگرام میں) ..... عمر ..... جنس .....  
 ہر سوال کے ایک درست ترین جواب کا انتخاب کریں۔

| کیٹگری 2                                                                                                                                                                                                                                                                                                                                                                           | کیٹگری 1                                                                                                                                                                                                                                                                                                                                                                                                                                                                             |
|------------------------------------------------------------------------------------------------------------------------------------------------------------------------------------------------------------------------------------------------------------------------------------------------------------------------------------------------------------------------------------|--------------------------------------------------------------------------------------------------------------------------------------------------------------------------------------------------------------------------------------------------------------------------------------------------------------------------------------------------------------------------------------------------------------------------------------------------------------------------------------|
| 6- مکمل نیند کے بعد بھی اکثر آپ پر تھکن کی کیفیت طاری رہتی ہے؟<br><input type="checkbox"/> الف قریباً ہر روز!<br><input type="checkbox"/> ب ہفتے میں 3 سے 4 بار!<br><input type="checkbox"/> ج ہفتے میں 1 سے 2 بار!<br><input type="checkbox"/> د مہینے میں 1 سے 2 بار!                                                                                                            | 1- کیا آپ خزانے بھرتے ہیں؟<br><input type="checkbox"/> الف جی ہاں!<br><input type="checkbox"/> ب جی نہیں!<br><input type="checkbox"/> ج ہاں نہیں!<br>2- اگر خزانے بھرتے ہیں تو ان کی آواز<br><input type="checkbox"/> الف سانس لینے کی آواز سے بلند رہتی ہے!<br><input type="checkbox"/> ب بولنے کی آواز کے مساوی ہوتی ہے!<br><input type="checkbox"/> ج بولنے کی آواز سے بھی بلند ہوتی ہے!<br><input type="checkbox"/> د اس قدر بلند ہوتی ہے کہ ساتھ کے کمرے میں بھی سنی جاسکتی ہے! |
| 7- کیا دن بھر بھی آپ پر تھکن کی کیفیت طاری رہتی ہے اور آپ خود<br>کتا زہم محسوس نہیں کرتے؟<br><input type="checkbox"/> الف قریباً ہر روز!<br><input type="checkbox"/> ب ہفتے میں 3 سے 4 بار!<br><input type="checkbox"/> ج ہفتے میں 1 سے 2 بار!<br><input type="checkbox"/> د مہینے میں 1 سے 2 بار!                                                                                 | 3- یہ خزانے کب کب واقع ہوتے ہیں؟<br><input type="checkbox"/> الف قریباً روزانہ!<br><input type="checkbox"/> ب ہفتے میں 3 سے 4 بار!<br><input type="checkbox"/> ج ہفتے میں 1 سے 2 بار!<br><input type="checkbox"/> د مہینے میں 1 سے 2 بار!<br><input type="checkbox"/> ر کبھی نہیں یا قریباً کبھی نہیں!                                                                                                                                                                               |
| 8- کیا گاڑی چلاتے ہوئے کبھی آپ نے خود پر اچھ بانیند کا غلبہ محسوس کیا ہے؟<br><input type="checkbox"/> الف جی ہاں!<br><input type="checkbox"/> ب جی نہیں!<br>9- اگر ہاں تو<br><input type="checkbox"/> الف قریباً ہر روز!<br><input type="checkbox"/> ب ہفتے میں 3 سے 4 بار!<br><input type="checkbox"/> ج ہفتے میں 1 سے 2 بار!<br><input type="checkbox"/> د مہینے میں 1 سے 2 بار! | 4- کیا آپ کے خزانے کبھی دوسروں کیلئے بیڑ لری کا سبب بنے ہیں؟<br><input type="checkbox"/> الف جی ہاں!<br><input type="checkbox"/> ب جی نہیں!<br><input type="checkbox"/> ج ہاں نہیں!                                                                                                                                                                                                                                                                                                  |
| کیٹگری 3                                                                                                                                                                                                                                                                                                                                                                           | 5- کسی نے کہا کہ نیند کے دوران آپ کی سانس رک بھی جاتی ہے؟<br><input type="checkbox"/> الف قریباً ہر روز!<br><input type="checkbox"/> ب ہفتے میں 3 سے 4 بار!<br><input type="checkbox"/> ج ہفتے میں 1 سے 2 بار!<br><input type="checkbox"/> د مہینے میں 1 سے 2 بار!                                                                                                                                                                                                                   |
| 10- آپ کا بلڈ پریشر زیادہ تو نہیں رہتا؟<br><input type="checkbox"/> الف جی ہاں!<br><input type="checkbox"/> ب جی نہیں!<br><input type="checkbox"/> ج ہاں نہیں!                                                                                                                                                                                                                     |                                                                                                                                                                                                                                                                                                                                                                                                                                                                                      |
